# Supplementary material
Source: Springer Nature journal article supplement (https://www.springermedizin.de/resource/supplementary/12885_2011_3501_MOESM3_ESM.pdf/9463014)

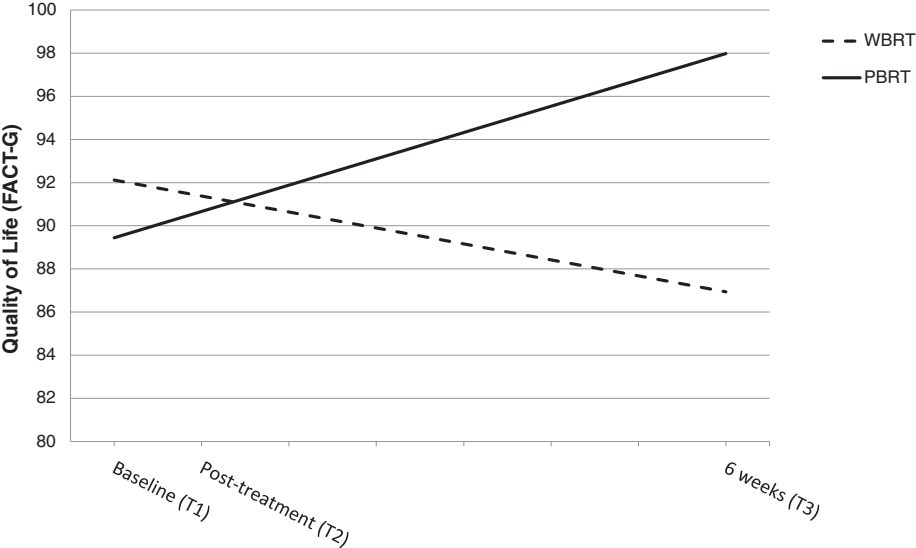

Supplement: MOESM3 [file 9463014]
